# Supplementary material for: The Chromatin Regulator CHD8 Is a Context-Dependent Mediator of Cell Survival in Murine Hematopoietic Malignancies
Source: PubMed Central journal article supplement (PMC4654476; doi:10.1371/journal.pone.0143275), 2015-11-20
Supplement: pone.0143275.s002.pdf [file pone.0143275.s002.pdf]

Chd8 sgRNA-1: CTA CCA GGC -AGA **TAG**  
Chd8 WT: 928 CTA CCA GGC AAG ATA G 943

Chd8 sgRNA-2: GGG AGT --- --- --- --- --- -TAC AGG GCA ACC AGC **TAG**  
Chd8 WT: 922 GGG AGT CTA CCA GGC AAG ATA GTG TTA CAG GGC AAC CAG CTA G 964

Chd8 sgRNA-3: GTG T-- CA GGG CAA CCA ..... **TAA** 1265  
Chd8 WT: 943 GTG TTA CAG GGC AAC ..... GTT AA 1265

Chd8 sgRNA-5: AAG ATA --- --- CAG GGC AAC  
Chd8 WT: 937 AAG ATA GTG TTA CAG GGC AAC 957
