# Supplementary material for: The Chromatin Regulator CHD8 Is a Context-Dependent Mediator of Cell Survival in Murine Hematopoietic Malignancies
Source: PubMed Central journal article supplement (PMC4654476; doi:10.1371/journal.pone.0143275), 2015-11-20

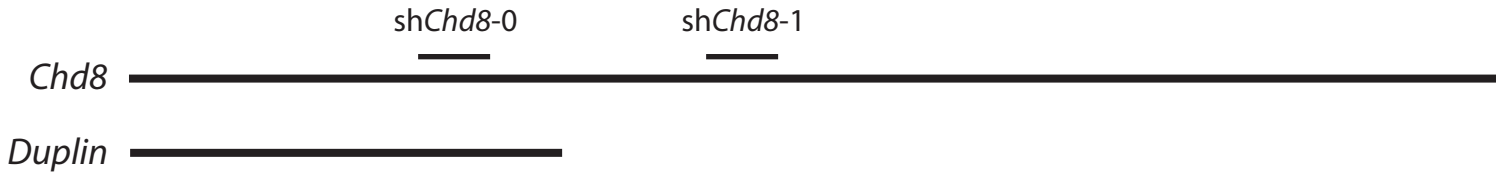

Supplement: pone.0143275.s004.pdf [file pone.0143275.s004.pdf]
